# Supplementary material for: Marriage contributes to higher obesity risk in China: findings from the China Health and Nutrition Survey
Source: PubMed Central journal article supplement — Ann Transl Med. 2021 Apr;9(7):564. doi: 10.21037/atm-20-4550 (PMC8105842; doi:10.21037/atm-20-4550), 2021-04
Supplement: atm-09-07-564-dss.pdf [file atm-09-07-564-dss.pdf]

## Data Sharing Statement

|                     |                                                                                                                                                    |                                                                                                                                                                                                                                                                                       |
|---------------------|----------------------------------------------------------------------------------------------------------------------------------------------------|---------------------------------------------------------------------------------------------------------------------------------------------------------------------------------------------------------------------------------------------------------------------------------------|
| <b>Article Info</b> | http://dx.doi.org/10.21037/atm-20-4550                                                                                                             |                                                                                                                                                                                                                                                                                       |
| <b>Item</b>         | <b>Question</b>                                                                                                                                    | <b>Authors' Response<br/>(place "-" if not applicable)</b>                                                                                                                                                                                                                            |
| 1                   | Would you like to share data collected for your study to others?                                                                                   | Yes                                                                                                                                                                                                                                                                                   |
| 2                   | If not, would you like to share the reason for your decision?                                                                                      | -                                                                                                                                                                                                                                                                                     |
| 3                   | What data in particular will be shared?                                                                                                            | There are BMI and marital status data in our paper.                                                                                                                                                                                                                                   |
| 4                   | Any other documents will be share? Such as study protocol, statistical analysis plan, informed consent form, clinical study report, analytic code. | Statistical analysis plan and model data will also be shared if requested.                                                                                                                                                                                                            |
| 5                   | When will data availability begin?                                                                                                                 | From the publication date.                                                                                                                                                                                                                                                            |
| 6                   | When will data availability end?                                                                                                                   | Three years within the publication date, since the date may be updated over time.                                                                                                                                                                                                     |
| 7                   | To whom will you share the data?                                                                                                                   | People who are interested in studies of relationship of BMI and marriage, and chronic disease.                                                                                                                                                                                        |
| 8                   | For what type of analysis or purpose?                                                                                                              | For analysis to relationship of BMI and marriage.                                                                                                                                                                                                                                     |
| 9                   | How or where can the data/documents be obtained?                                                                                                   | Share data is available on this website( <a href="https://www.cpc.unc.edu/projects/china">https://www.cpc.unc.edu/projects/china</a> ) or emails could be sent to the address below to obtain the shared data: <a href="mailto:liujinli@stu.xjtu.edu.cn">liujinli@stu.xjtu.edu.cn</a> |
| 10                  | Any other restrictions?                                                                                                                            | We may balance the potential benefits and risks for each request and then provide the data that could be shared.                                                                                                                                                                      |
